# Supplementary material for: Insights into Pt–CN species on an alumina-supported platinum catalyst as active intermediates or inhibitors for low-temperature hydrogen cyanide synthesis from methane and nitric oxide
Source: Royal Society of Chemistry journal article supplement (doi:10.1039/d3cy00581j), 2023-01-01
Supplement: d3cy00581j1.pdf [file d3cy00581j1.pdf]

Supplementary Material

**Insights into Pt-CN Species on an Alumina-supported Platinum Catalyst as Active Intermediates or Inhibitors for Low-temperature Hydrogen Cyanide Synthesis from Methane and Nitric Oxide**

Atsushi Takagaki,<sup>\*a</sup> Kyoko K. Bando,<sup>\*b</sup> Tatsuya Yamasaki,<sup>c</sup> Junichi Murakami,<sup>b</sup> Nobuya Suganuma,<sup>d</sup> I. Tyrone Ghampson,<sup>d</sup> Tetsuya Kodaira,<sup>e</sup> Tatsumi Ishihara,<sup>c,f</sup> and Tetsuya Shishido<sup>\*d,g</sup>

<sup>a</sup> *Division of Materials and Chemical Engineering, Faculty of Engineering, Yokohama National University, 79-5 Tokiwadai, Hodogaya-ku, Yokohama, Kanagawa 240-8501, Japan.*

<sup>b</sup> *Nanomaterials Research Institute, National Institute of Advanced Industrial Science and Technology (AIST), 1-1-1, Higashi, Tsukuba, Ibaraki 305-8565, Japan.*

<sup>c</sup> *Department of Applied Chemistry, Faculty of Engineering, Kyushu University, 744 Motoooka, Nishi-ku, Fukuoka 819-0395, Japan.*

<sup>d</sup> *Department of Applied Chemistry for Environment, Graduate School of Urban Environmental Sciences, Tokyo Metropolitan University, 1-1 Minami-osawa, Hachioji, Tokyo 192-0397, Japan.*

<sup>e</sup> *Research Institute for Chemical Process Technology, National Institute of Advanced Industrial Science and Technology (AIST), 1-1-1, Higashi, Tsukuba, Ibaraki 305-8565, Japan.*

<sup>f</sup> *International Institute for Carbon-Neutral Energy Research (WPI-PCNER), Kyushu University, 711 Motoooka, Nishi-ku, Fukuoka 819-0395, Japan.*

<sup>g</sup> *Elements Strategy Initiative for Catalysts and Batteries, Kyoto University, 1-30 Goryo-Ohara, Nishikyo-ku, Kyoto 615-8245, Japan.*

E-mail: [takagaki-atsushi-gw@ynu.ac.jp](mailto:takagaki-atsushi-gw@ynu.ac.jp), [k.k.bando@aist.go.jp](mailto:k.k.bando@aist.go.jp), [shishido-tetsuya@tmu.ac.jp](mailto:shishido-tetsuya@tmu.ac.jp)

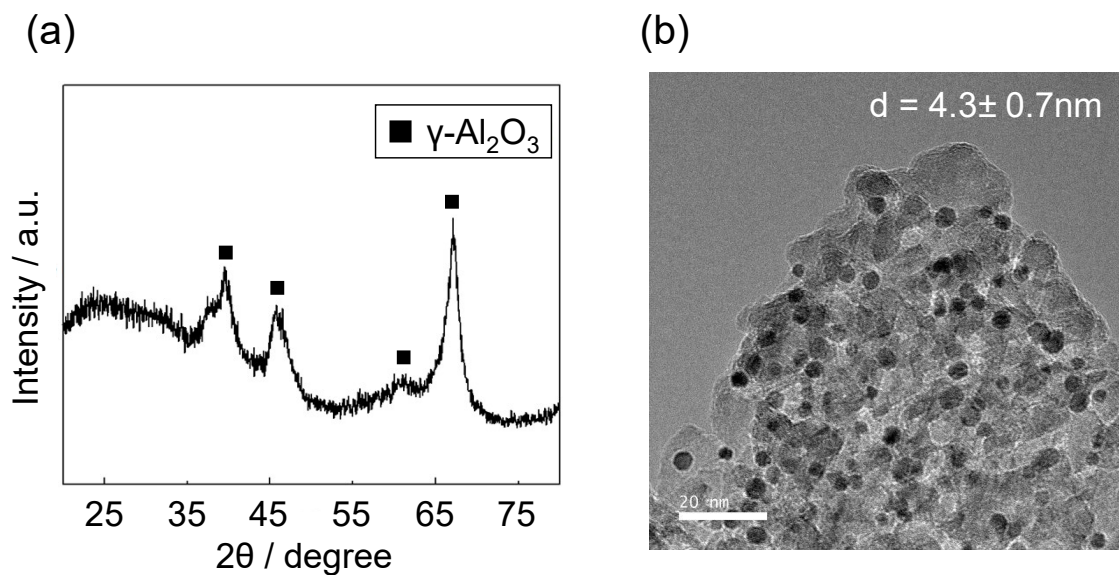

**Figure S1.** XRD pattern (a) and TEM image (b) of 5wt%Pt/ $\text{Al}_2\text{O}_3$ .

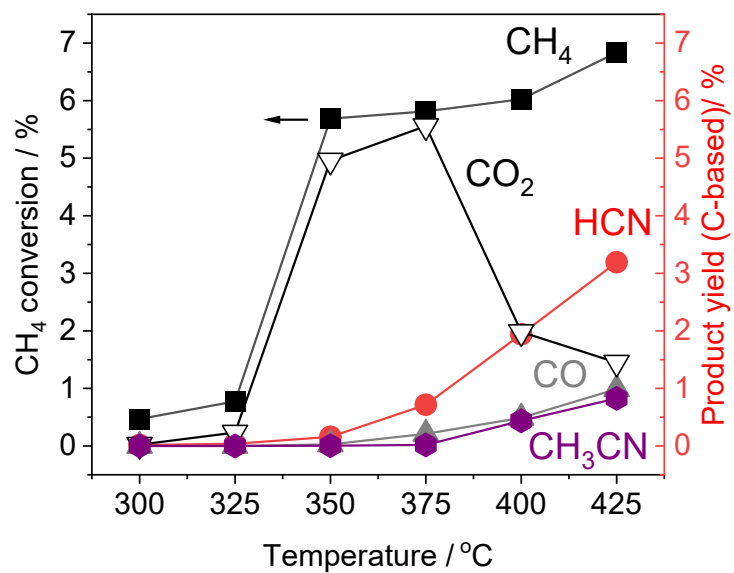

**Figure S2.** Methane conversion and product yield (C-based) as a function of reaction temperature for the reaction of methane with nitric oxide over Pt/ $\text{Al}_2\text{O}_3$  catalyst. Reaction conditions: 5wt% Pt/ $\text{Al}_2\text{O}_3$  (100 mg),  $\text{CH}_4$ : NO: He = 13.4: 1.8: 84.8 (total flow rate: 100 mL  $\text{min}^{-1}$ ), and 0.1 MPa.
